# Supplementary material
Source: Springer Nature journal article supplement (https://www.springermedizin.de/resource/supplementary/12967_2012_1042_MOESM10_ESM.pdf/9573616)

A.

| Dimensions <span style="float: right;">+ -</span> |               |        | Project  |          |          |          |          |          |
|---------------------------------------------------|---------------|--------|----------|----------|----------|----------|----------|----------|
|                                                   |               |        | Flu 15   |          | Flu 17   |          | Flu 18   |          |
|                                                   |               |        | Gender   |          | Gender   |          | Gender   |          |
|                                                   |               |        | Female   | Male     | Female   | Male     | Female   | Male     |
|                                                   |               |        | Measures | Measures | Measures | Measures | Measures | Measures |
| Analyte Tree                                      | Units         | Stim   | ○ Mean   |
| <input checked="" type="checkbox"/> IL6           | avg Intensity | none   | 310.1    | 223.8    | 348.4    | 289.1    | 400.8    | 301.9    |
| <input checked="" type="checkbox"/> CD4+: pSTAT1  | 90th %tile    | IL-6   | 1,286.1  | 1,408.1  | 926.9    | 1,110.8  | 801.4    | 978.6    |
|                                                   |               | Unstim | 403.0    | 414.0    | 289.3    | 264.6    | 238.9    | 255.7    |
|                                                   | stim/unstim   | IL-6   | 3.0      | 3.8      | 3.1      | 4.2      | 3.3      | 4.0      |

Filter: Age Band=[<40], Sample Type=[person], Timepoint=[Day00]

B.

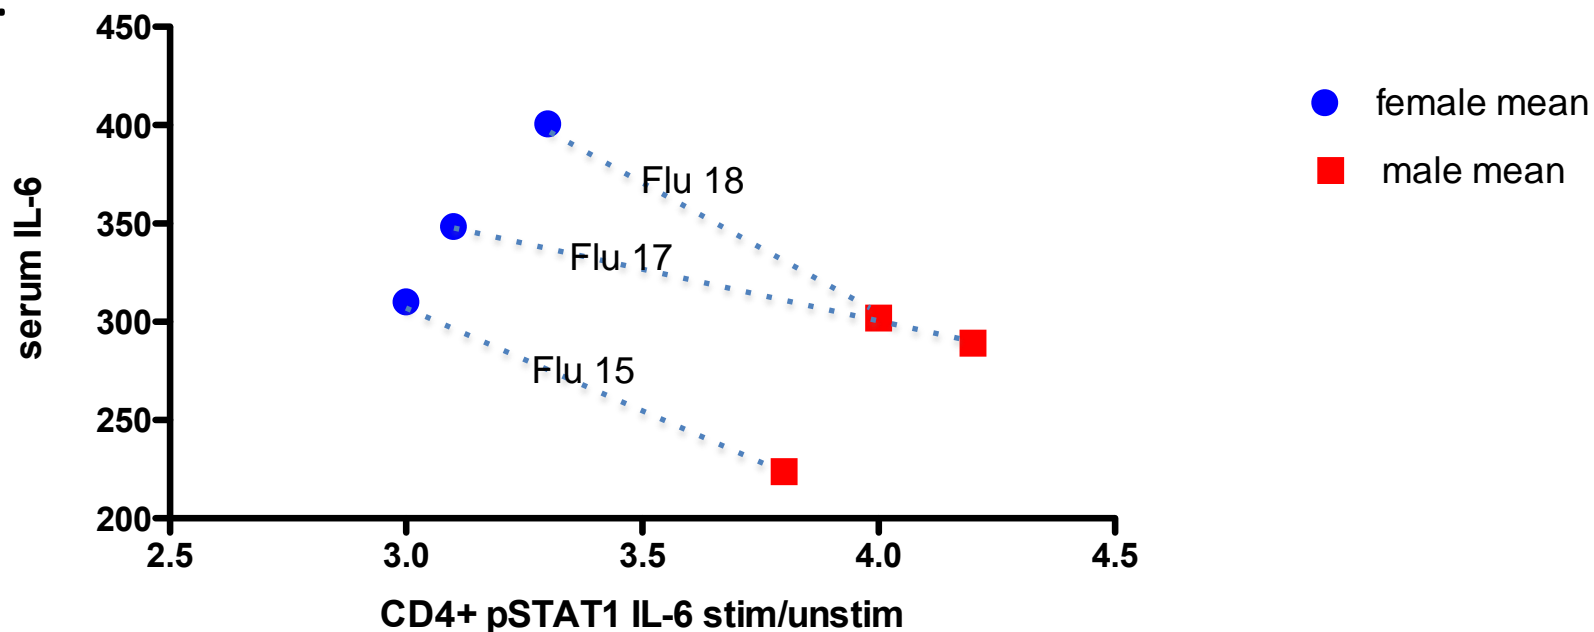

Supplement: MOESM10 [file 9573616]
